# Supplementary material for: An assembly and alignment-free method of phylogeny reconstruction from next-generation sequencing data
Source: PubMed Central journal article supplement (PMC4501066; doi:10.1186/s12864-015-1647-5), 2015-07-14
Supplement: 12864_2015_1647_MOESM2_ESM.pdf [file 12864_2015_1647_MOESM2_ESM.pdf]

**Table S1:** Branch Score Distance (BSD) between the optimal AAF tree ( $k = 21$ ) generated from assembled data of the 11 primate dataset (Fig. 2B) and trees generated with larger  $k$ .

| Tree     | BSD   |
|----------|-------|
| $k = 23$ | 0.014 |
| $k = 25$ | 0.014 |
| $k = 27$ | 0.011 |
| $k = 31$ | 0.007 |
