# Supplementary material for: An assembly and alignment-free method of phylogeny reconstruction from next-generation sequencing data
Source: PubMed Central journal article supplement (PMC4501066; doi:10.1186/s12864-015-1647-5), 2015-07-14
Supplement: 12864_2015_1647_MOESM3_ESM.pdf [file 12864_2015_1647_MOESM3_ESM.pdf]

**Table S2: General information and accession numbers in NCBI Short Reads Archive of the mammal dataset**

| Common name  | Latin name                           | Read length (bp) | Total bp(MB) | Coverage | Sequencing platform          | Accession                                                     |
|--------------|--------------------------------------|------------------|--------------|----------|------------------------------|---------------------------------------------------------------|
| Orangutan    | <i>Pongo abelii</i>                  | 100              | 18,965       | 5.39     | Illumina HiSeq 2000          | SRR748032                                                     |
| Gorilla      | <i>Gorilla gorilla</i>               | 100              | 9,404        | 2.73     | Illumina HiSeq 2000          | SRR748194                                                     |
| Human        | <i>Homo sapiens</i>                  | 100              | 6,969        | 2.04     | Illumina HiSeq 2000          | ERR251906                                                     |
| Chimpanzee   | <i>Pan troglodytes</i>               | 101              | 7,056        | 2.09     | Illumina Genome Analyzer II  | ERR032961                                                     |
| Macaque      | <i>Macaca mulatta</i>                | 49               | 9,513        | 2.76     | Illumina Genome Analyzer II  | SRR278740                                                     |
| Baboon       | <i>Papio anubis</i>                  | 95               | 6,383        | 1.85     | Illumina Genome Analyzer IIx | SRR927656                                                     |
| Bushbaby     | <i>Otolemur garnettii</i>            | 101              | 3,216        | 0.91     | Illumina Genome Analyzer II  | SRR016879                                                     |
| Cat          | <i>Felis catus</i>                   | 563              | 5,091        | 1.79     | 454 GS FLX Titanium          | SRR069335-SRR069379                                           |
| Pika         | <i>Ochotona princeps</i>             | 110              | 9,800        | 2.05     | Illumina HiSeq 2000          | SRR402203-SRR402205<br>SRR402207                              |
| Squirrel     | <i>Spermophilus tridecemlineatus</i> | 101              | 18,000       | 7.26     | Illumina HiSeq 2000          | SRR305235<br>SRR305236<br>SRR317823                           |
| Rat          | <i>Rattus norvegicus</i>             | 91               | 10,200       | 3.51     | Illumina Genome Analyzer II  | SRR351210                                                     |
| Mouse        | <i>Mus musculus</i>                  | 37               | 13,900       | 5.01     | Illumina HiSeq 2000          | SRR091261                                                     |
| Horse        | <i>Equus przewalski</i>              | 99               | 13,269       | 5.36     | Illumina HiSeq 2000          | SRR896620<br>SRR896621<br>SRR896641<br>SRR896644<br>SRR899939 |
| Hedgehog     | <i>Erinaceus europaeus</i>           | 102              | 10,000       | 2.96     | Illumina HiSeq 2000          | SRR396597                                                     |
| Alpaca       | <i>Vicugna pacos</i>                 | 501              | 7,561        | 2.55     | 454 GS FLX Titanium          | SRR531044-SRR531070                                           |
| Common Shrew | <i>Sorex araneus</i>                 | 102              | 11,100       | 3.77     | Illumina HiSeq 2000          | SRR278622                                                     |
| Dog          | <i>Canis lupus familiaris</i>        | 45               | 5,500        | 2.28     | Illumina Genome Analyzer IIx | SRR782085                                                     |
| Sloth        | <i>Choloepus hoffmanni</i>           | 101              | 20,500       | 8.31     | Illumina HiSeq 2000          | SRR866928                                                     |
