# Supplementary material for: An assembly and alignment-free method of phylogeny reconstruction from next-generation sequencing data
Source: PubMed Central journal article supplement (PMC4501066; doi:10.1186/s12864-015-1647-5), 2015-07-14
Supplement: 12864_2015_1647_MOESM5_ESM.pdf [file 12864_2015_1647_MOESM5_ESM.pdf]

**Table S3: General information and accession numbers of the 21 tropical trees dataset.**

| Species                                             | Code | Read Length (bp) | Total Base Pair | Coverage | Accession    |
|-----------------------------------------------------|------|------------------|-----------------|----------|--------------|
| <i>Intsia bijuga</i>                                | IB   | 76               | 9,170,193,440   | 5.49     | SRX596332    |
| <i>Intsia palembanica</i><br>(1 individual)         | IP1  | 76               | 10,185,026,760  | 5.99     | SRX600007    |
| <i>Intsia palembanica</i><br>(10 individual pooled) | IP2  | 76               | 9,910,279,616   | 4.79     | SRX600313    |
| <i>Castanopsis echinocarpa</i>                      | CE   | 51               | 2,055,720,648   | 1.84     | SRX017482    |
| <i>Castanopsis indica</i>                           | CI   | 51               | 1,992,413,430   | 1.80     | SRX017483    |
| <i>Castanopsis sp.</i>                              | CS   | 51               | 2,051,372,694   | 4.03     | SRX602174    |
| <i>Lithocarpus balansae</i>                         | LB   | 51               | 1,759,605,978   | 1.62     | SRX016680    |
| <i>Lithocarpus calolepis</i>                        | LC   | 51               | 2,095,070,004   | 1.64     | SRX017436    |
| <i>Lithocarpus fenestratus</i>                      | LF   | 76               | 9,774,729,816   | 9.22     | SRX601832    |
| <i>Lithocarpus grandifolius</i>                     | LG   | 51               | 2,001,160,644   | 1.71     | SRX017338    |
| <i>Lithocarpus hancei</i>                           | LH   | 51               | 3,243,525,846   | 2.79     | SRX017339    |
| <i>Lithocarpus craibianus</i>                       | LR   | 76               | 8,993,204,336   | 6.39     | SRX601833    |
| <i>Lithocarpus xylocarpus</i>                       | LX   | 51               | 2,693,888,340   | 2.39     | SRX017340    |
| <i>Trigonobalanus doichangensis</i>                 | TD   | 51               | 3,574,391,304   | 3.92     | SRX017683    |
| <i>Ficus altissima</i>                              | FA   | 51               | 2,230,794,570   | 4.75     | SRX017643    |
| <i>Ficus fistulosa</i>                              | FF   | 51               | 894,202,584     | 3.58     | SRX016302    |
| <i>Ficus langkokensis</i>                           | FL   | 51               | 2,054,006,640   | 5.81     | SRX017645    |
| <i>Ficus microcarpa</i>                             | FM   | 51               | 1,487,138,886   | 4.24     | SRX017740    |
| <i>Ficus racemosa</i>                               | FR   | 76               | 9,068,985,456   | 8.99     | SRX601830    |
| <i>Ficus tinctoria</i>                              | FT   | 51               | 4,828,850,952   | 7.02     | SRX017840    |
| <i>Ficus vasculosa</i>                              | FV   | 76               | 9,638,585,392   | 11.68    | SRX600314    |
| <i>Gonystylus bancanus</i>                          | GB   | 51               | 2,265,978,756   | 4.41     | SRX012692-94 |
