# Supplementary material for: An assembly and alignment-free method of phylogeny reconstruction from next-generation sequencing data
Source: PubMed Central journal article supplement (PMC4501066; doi:10.1186/s12864-015-1647-5), 2015-07-14

Topological mistakes

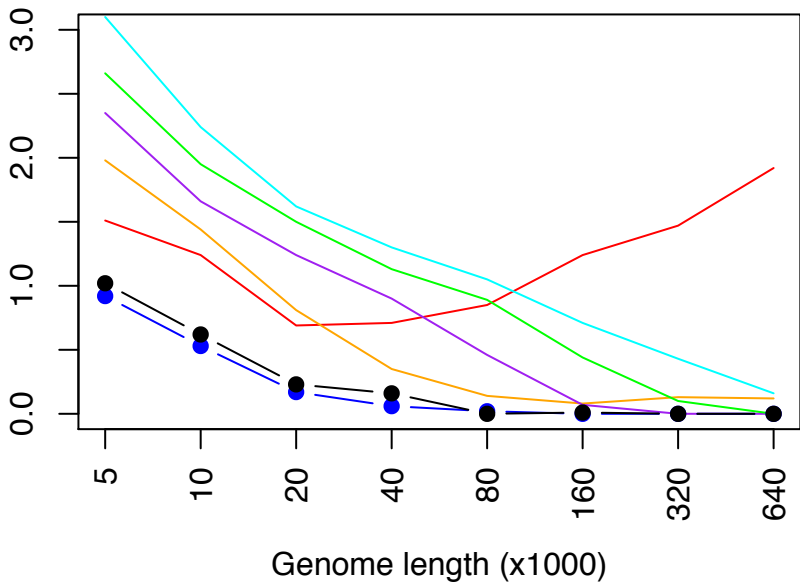

Supplement: 12864_2015_1647_MOESM7_ESM.pdf [file 12864_2015_1647_MOESM7_ESM.pdf]
